# Supplementary material for: Fluorescence and phosphorescence study of germanium–acetylene polymers and germa[N]pericyclynes
Source: Royal Society of Chemistry journal article supplement (doi:10.1039/c5py01255d), 2015-01-01
Supplement: c5py01255d1.pdf [file c5py01255d1.pdf]

Supporting Information of

**Fluorescent and Phosphorescent Study of Germanium-Acetylene Polymers and  
Germa[M]pericyclines**

Hiroki Tanimoto,<sup>\*a</sup> Tomohiko Nagao,<sup>a</sup> Taro Fujiwara,<sup>a</sup> Takahiro Kakuta,<sup>b</sup> Kazuo Tanaka,<sup>b</sup>  
Yoshiki Chujo,<sup>b</sup> and Kiyomi Kakiuchi<sup>\*a</sup>

<sup>a</sup> Graduate School of Materials Science, Nara Institute of Science and Technology (NAIST), 8916-5 Ta-  
kayamacho, Ikoma, Nara 630-0192, Japan

<sup>b</sup> Department of Polymer Chemistry, Graduate School of Engineering Kyoto University, Katsura,  
Nishikyo-ku, Kyoto 615-8510, Japan.

tanimoto@ms.naist.jp; kakiuchi@ms.naist.jp

|                                                                   |     |
|-------------------------------------------------------------------|-----|
| General Information                                               | S1  |
| Synthesis of germanium-acetylene materials                        | S1  |
| UV-visible absorption spectra                                     | S5  |
| Fluorescence emission spectra                                     | S6  |
| Phosphorescence emission spectra                                  | S7  |
| Cyclic voltammetry (CV) and differential pulse voltammetry (DPV)  | S8  |
| GPC analysis results                                              | S9  |
| HOMO/LUMO orbitals and energy levels estimated by DFT calculation | S10 |
| <sup>1</sup> H and <sup>13</sup> C NMR spectra                    | S13 |
| References                                                        | S18 |

## • General information

$^1\text{H}$  and  $^{13}\text{C}$  NMR spectra were recorded using a JEOL JNM-ECP500 spectrometer (500 MHz for  $^1\text{H}$  NMR and 126 MHz for  $^{13}\text{C}$  NMR). Chemical shifts are reported as  $\delta$  values in ppm and calibrated with respect to the residual solvent peak ( $\text{CDCl}_3$ ,  $\delta$  7.26 for  $^1\text{H}$  NMR and  $\delta$  77.00 for  $^{13}\text{C}$  NMR) or tetramethylsilane ( $\delta$  0 for  $^1\text{H}$  NMR). The abbreviations used are as follows: s (singlet), d (doublet), t (triplet), q (quartet), sept (septet), br (broad peak), and m (complex multiplet). Melting points were measured using a Yanaco Micro melting point apparatus. Infrared spectra were measured using a Jasco FT-IR-4200 spectrometer. Mass spectra were recorded using a JEOL JMS-700 MStation [EI (70 eV), CI, FAB, and ESI], and Bruker Autoflex II (MALDI-TOF). UV-visible UV/visible spectra were recorded using Jasco V-630. Fluorescence spectra were collected using JASCO FP-6500. Low temperature fluorescence and phosphorescence emission spectra were recorded on a Horiba Jobin Yvon Fluoromax-4 spectrofluorometer. The cyclic voltammetry measurements of the compounds were performed using a BAS electrochemical analyser ALS612D in dichloromethane containing  $n\text{-Bu}_4\text{NPF}_6$  as the supporting electrolyte at 298 K ( $100\text{ mV s}^{-1}$ ). The glassy carbon working electrode was polished using BAS polishing alumina suspension and rinsed with water before use. The counter electrode was a platinum wire. The measured potentials were recorded with respect to  $\text{Ag}/\text{AgNO}_3$  and normalized with respect to  $\text{Fc}/\text{Fc}^+$ . Flash column chromatography was performed using Merck Silica gel 60. The progress of the reactions was monitored by silica gel thin layer chromatography (TLC) (Merck TLC Silica gel 60  $F_{254}$ ). The further purifications of the crude materials were performed using a LC-908 recycling preparative high-performance liquid chromatography (HPLC) equipped with a JAIGEL 2H-40 column (chloroform elution) made by Japan Analytical Industry Co., Ltd. The number-average molecular weight ( $M_n$ ) and the molecular weight distribution [weight-average molecular weight/number-average molecular weight ( $M_w/M_n$ )] values of polymer were estimated by size-exclusion chromatography with a TOSOH G3000HXL system equipped with three consecutive polystyrene gel columns (TOSOH gels:  $\alpha$ -4000,  $\alpha$ -3000,  $\alpha$ -2500) and ultraviolet detector, at  $40\text{ }^\circ\text{C}$ . The system was operated at a flow rate of  $1.0\text{ mL/min}$  with chloroform as an eluent. Iodine on silica gel and Ethanol solutions of phosphomolybdic acid were used for the TLC stains, and TLC was also monitored with UV lamp. All the reagents were purchased from Sigma-Aldrich, Wako Pure Chemical Industries, Ltd, TCI (Tokyo Chemical Industry, Co. Ltd), Kanto Chemical Co. Inc., and Nakalai Tesque. Anhydrous tetrahydrofuran (THF) was purchased from Kanto Chemical, which was further dehydrated over activated molecular sieves 4A. Density Functional Theory (DFT) calculations were performed using the Gaussian09, and the geometries of the molecules were optimized by employing the B3LYP density functionals and the 6-31G(d,p) basis set in this series of calculations. For preparation procedures and characterizations of compounds which are not noted here, see our previous works.<sup>1,2</sup>

## • Synthesis of germanium-acetylene materials

### Diphenylbis(trimethylgermyl)ethynylgermane (2a)

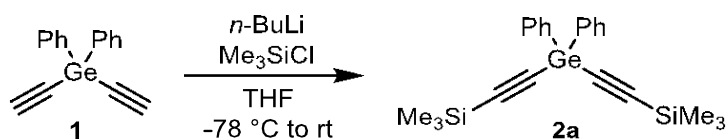

$n$ -Butyllithium (1.63 M in hexane, 1.98 mL, 3.23 mmol) was added dropwise to a stirred solution of diethynyldiphenylgermane **1a** (406 mg, 1.47 mmol)<sup>1</sup> in THF (14 mL) at  $-78\text{ }^\circ\text{C}$  under a nitrogen atmosphere. After 2 h,

chlorotrimethylsilane (350 mg, 3.23 mmol) was added at the same temperature, and the reaction mixture was warmed up to ambient temperature and was stirred for 71 h. The reaction was quenched with a saturated

aqueous solution of ammonium chloride at 0 °C. The resulting mixture was extracted with ether, and the organic layer was washed with water and brine. The combined organic layer was dried over magnesium sulfate, and the solvent was removed *in vacuo*. The resulting residue was purified by silica gel column chromatography (hexane to hexane/dichloromethane = 1/20) to afford diphenylbis((trimethylsilyl)ethynyl)germane **2a** (539 mg, 87%) as a white solid. Recrystallization (dichloromethane–hexane) was also performed to afford colorless crystal.

colorless crystal;  $R_f$  value 0.14 (hexane/dichloromethane = 20/1); m.p. 80.5–81.0 °C; IR (KBr, disc)  $\nu_{\max}$  3068, 3053, 2962, 1484, 1431, 1249, 1092  $\text{cm}^{-1}$ ;  $^1\text{H}$  NMR (500 MHz,  $\text{CDCl}_3$ )  $\delta$  7.68–7.66 (m, 4H), 7.41–7.39 (m, 6H), 0.23 (s, 18H);  $^{13}\text{C}$  NMR (126 MHz,  $\text{CDCl}_3$ )  $\delta$  134.2, 133.7, 129.8, 128.4, 116.4, 104.8, –0.16; LRMS (ESI)  $m/z$  444  $[\text{M}+\text{Na}]^+$ .

### Bis(3,3-dimethylbut-1-yn-1-yl)diphenylgermane (2b)

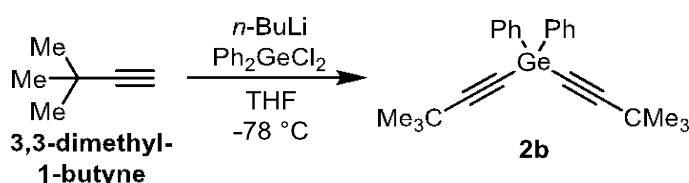

$n$ -Butyllithium (1.63 M in hexane, 4.53 mL, 7.39 mmol) was added dropwise to a stirred solution of 3,3-dimethyl-1-butyne (603 mg, 7.39 mmol) in THF (33 mL) at  $-78\text{ }^\circ\text{C}$  under nitrogen atmosphere. After 2 h, dichlorodiphenylgermane (1.0 g, 3.36 mmol) was added at the same temperature, and the reaction mixture was stirred for 1 h. The reaction mixture was warmed up to ambient temperature and stirred for 13 h. The reaction was quenched with a saturated aqueous solution of ammonium chloride at 0 °C. The resulting mixture was extracted with ether, and the organic layer was washed with water and brine. The combined organic layer was dried over magnesium sulfate, and the solvent was removed *in vacuo*. The resulting residue was purified by silica gel column chromatography (hexane to hexane/dichloromethane = 20/1) to afford bis(3,3-dimethylbut-1-yn-1-yl)diphenylgermane **2b** (1.39 g, quant.) as a white solid. Recrystallization (dichloromethane–hexane) was also performed to afford colorless crystal.

colorless crystal;  $R_f$  value 0.16 (hexane/dichloromethane = 20/1); m.p. 77.6–79.8 °C; IR (KBr, disc)  $\nu_{\max}$  3069, 3056, 2972, 2180, 2147, 1484, 1431, 1250, 1093  $\text{cm}^{-1}$ ;  $^1\text{H}$  NMR (500 MHz,  $\text{CDCl}_3$ )  $\delta$  7.69–7.66 (m, 4H), 7.39–7.37 (m, 6H), 1.30 (s, 18H);  $^{13}\text{C}$  NMR (126 MHz,  $\text{CDCl}_3$ )  $\delta$  136.0, 133.6, 129.4, 128.2, 117.6, 74.8, 30.9, 28.4; LRMS (ESI)  $m/z$  413  $[\text{M}+\text{Na}]^+$ .

### 1,2-Bis(ethynyldiphenylgermyl)ethyne (3)

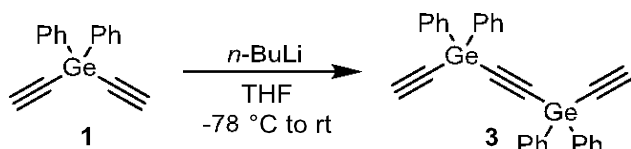

To a stirred solution of diethynyldiphenylgermane **1** (1.0 g, 3.61 mmol)<sup>1</sup> in THF (36 mL) was added  $n$ -butyllithium (1.6 M in hexane, 2.26 mL, 3.61 mmol) at  $-78\text{ }^\circ\text{C}$  under nitrogen atmosphere. After 12 h, the reaction mixture was warmed up to room temperature and was stirred for 10 h. The reaction was quenched with saturated ammonium chloride aqueous solution at 0 °C. The mixture was extracted with ether and was washed with brine. The combined organic layers were dried over magnesium sulfate, and the solvent was removed *in vacuo*. The residue was purified by silica gel column chromatography (hexane/dichloromethane = 20/1) to afford dimer **3** (435 mg, 46%) as a white solid, and recovered starting material **1** (300 mg, 30%).

white crystal;  $R_f$  value = 0.35 (hexane/dichloromethane = 3/1); m.p. 137.8–139.1 °C; IR (KBr, disc)  $\nu_{\max}$  3435, 3277, 3047, 2038, 1486, 1434, 1262, 1095  $\text{cm}^{-1}$ ;  $^1\text{H}$  NMR (500 MHz,  $\text{CDCl}_3$ )  $\delta$  7.72–7.70 (m, 8H), 7.46–7.39

(m, 12H), 2.61 (s, 2H);  $^{13}\text{C}$  NMR (126 MHz,  $\text{CDCl}_3$ )  $\delta$  133.7, 133.1, 130.1, 128.6, 107.4, 95.2, 82.5; LRMS (ESI)  $m/z$  551  $[\text{M}+\text{Na}]^+$ .

### 3,3,6,6,9,9,12,12,15,15,18,18,21,21-Tetradecaphenyl-3,6,9,12,15,18,21-heptagermatricosa-1,4,7,10,13,16,19,22-octayne (5)

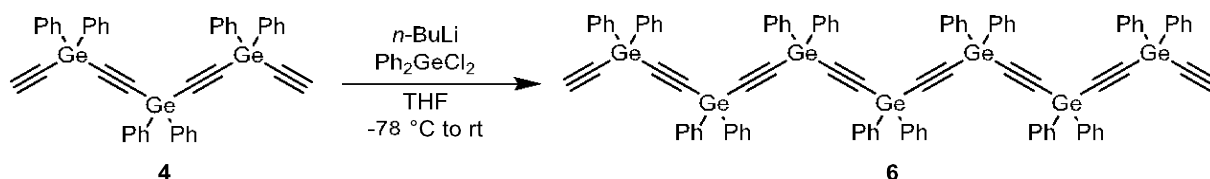

*n*-Butyllithium (1.63 M in hexane, 0.66 mL, 1.08 mmol) was added dropwise to a stirred solution of bis((ethynyldiphenylgermyl)ethynyl)diphenylgermane **4** (840 mg, 1.08 mmol)<sup>2</sup> in THF (11 mL) at  $-78\text{ }^\circ\text{C}$  under nitrogen atmosphere. After 2 h, dichlorodiphenylgermane (153 mg, 0.51 mmol) was added at the same temperature. Then the reaction mixture was warmed up to ambient temperature and stirred for 15 h. The reaction was quenched with a saturated aqueous solution of ammonium chloride at  $0\text{ }^\circ\text{C}$ . The resulting mixture was extracted with dichloromethane, and the organic layer was washed with water and brine. The combined organic layer was dried over magnesium sulfate, and the solvent was removed *in vacuo*. The resulting residue was purified by silica gel column chromatography (hexane/dichloromethane = 3/1 to 3/2) to afford diethynyldiphenylgermane-heptamer **5** (179 mg, 20%).

white solid;  $R_f$  value 0.16 (hexane/dichloromethane = 2/1); m.p.  $157.1\text{--}159.4\text{ }^\circ\text{C}$ ; IR (KBr, disc)  $\nu_{\text{max}}$  3267, 3070, 3024, 2037, 1485, 1433, 1094, 736  $\text{cm}^{-1}$ ;  $^1\text{H}$  NMR (500 MHz,  $\text{CDCl}_3$ )  $\delta$  7.73–7.68 (m, 28H), 7.74–7.30 (m, 42H), 2.58 (s, 2H);  $^{13}\text{C}$  NMR (126 MHz,  $\text{CDCl}_3$ )  $\delta$  133.8, 133.7, 133.42, 133.35, 133.1, 130.1, 130.0, 129.96, 128.6, 128.5, 107.9, 107.79, 107.75, 107.70, 107.6, 107.3, 95.3, 82.6; LRMS (ESI)  $m/z$  1805  $[\text{M}+\text{Na}]^+$ .

### Poly(diphenylgermylene)ethynylene (6)

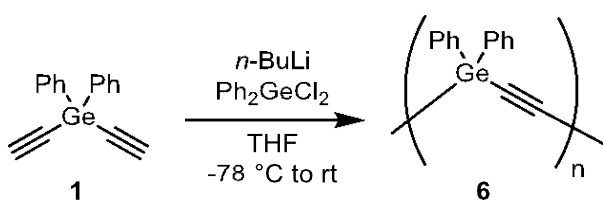

To a stirred solution of diethynyldiphenylgermane **1** (1.02 g, 3.68 mmol) in THF (180 mL) was added *n*-butyllithium (1.63 M in hexane, 4.52 mL, 7.37 mmol) dropwise at  $-78\text{ }^\circ\text{C}$  under nitrogen atmosphere. After 2 h, dichlorodiphenylgermane (1.09 g, 3.68 mmol) was added at the same temperature. Then the reaction

mixture was warmed up to ambient temperature and stirred for 48 h. The reaction was quenched with a saturated aqueous solution of ammonium chloride at  $0\text{ }^\circ\text{C}$ . The resulting mixture was extracted with dichloromethane, and the organic layer was washed with water and brine. The combined organic layer was dried over magnesium sulfate, and the solvent was removed *in vacuo*. The resulting residue was purified by silica gel column chromatography (hexane/dichloromethane = 5/1 to dichloromethane elution) to afford Diethynyldiphenylgermane-polymer **6** (757 mg, 41%) as a light pink amorphous, which were transformed into light pink solid by reprecipitation (dichloromethane/hexane).

light pink solid;  $R_f$  value 0.23–0.10 (multispot) (hexane/ dichloromethane = 1/2); m.p.  $70\text{--}86\text{ }^\circ\text{C}$  ( for amorphous),  $109.9\text{--}127.8\text{ }^\circ\text{C}$  (for reprecipitation solid); IR (KBr, disc)  $\nu_{\text{max}}$  3268, 3070, 3025, 2037, 1485, 1094, 735  $\text{cm}^{-1}$ ;  $^1\text{H}$  NMR (500 MHz,  $\text{CDCl}_3$ )  $\delta$  7.85–7.67 (br, 85H), 7.49–7.23 (br, 123H), 2.63–2.59 (br, 2H);  $^{13}\text{C}$  NMR (126 MHz,  $\text{CDCl}_3$ )  $\delta$  133.8, 133.7, 133.5, 133.4, 130.1, 130.0, 128.5, 128.2, 107.9, 107.8, 107.3, 95.3, 82.6;

TOF-MS (MALDI)  $m/z$  7334 (max) ( $M^+$ ); Weight-average molecular weight  $M_w = 3420$ ; Number-average molecular weight  $M_n = 2780$ ;  $M_w/M_n = 1.2$ ; Degree of polymerization  $DP = 10.9$  estimated by number-average molecular weight.

• UV-visible and fluorescence emission spectra

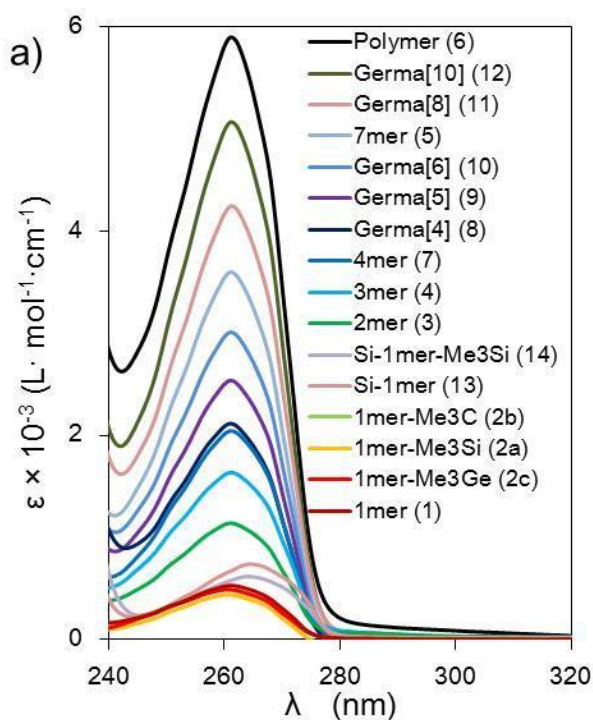

Fig SI 1. UV-vis absorption spectra (0.1 mM in CH<sub>2</sub>Cl<sub>2</sub>)

| Compounds               |                        | Number of Ph rings | $\epsilon$ at 260 nm (L·mol <sup>-1</sup> ·cm <sup>-1</sup> ) |
|-------------------------|------------------------|--------------------|---------------------------------------------------------------|
| 1mer                    | <b>1</b> <sup>1</sup>  | 2                  | 520                                                           |
| 1mer-Si                 | <b>2a</b>              | 2                  | 440                                                           |
| 1mer-C                  | <b>2b</b>              | 2                  | 490                                                           |
| 1mer-Ge                 | <b>2c</b> <sup>2</sup> | 2                  | 490                                                           |
| Si-1mer <sup>a</sup>    | <b>13</b>              | 2                  | 640                                                           |
| Si-1mer-Si <sup>b</sup> | <b>14</b>              | 2                  | 560                                                           |
| 2mer                    | <b>3</b>               | 4                  | 1130                                                          |
| 3mer                    | <b>4</b>               | 6                  | 1610                                                          |
| 4mer                    | <b>7</b>               | 8                  | 2010                                                          |
| Ge[4]                   | <b>8</b> <sup>1</sup>  | 8                  | 2100                                                          |
| Ge[5]                   | <b>9</b> <sup>2</sup>  | 10                 | 2500                                                          |
| Ge[6]                   | <b>10</b> <sup>1</sup> | 12                 | 3000                                                          |
| 7mer                    | <b>5</b>               | 14                 | 3540                                                          |
| Ge[8]                   | <b>11</b> <sup>1</sup> | 16                 | 4170                                                          |
| Ge[10]                  | <b>12</b> <sup>2</sup> | 20                 | 4980                                                          |
| poly                    | <b>6</b>               | ≈22                | 5800                                                          |

<sup>a</sup> $\lambda_{\max} = 264$  nm ( $\epsilon = 740$ ), <sup>b</sup> $\lambda_{\max} = 264$  nm ( $\epsilon = 620$ )

Fig SI 2.  $\epsilon$  values at 260 nm versus number of benzene rings (0.1 mM in CH<sub>2</sub>Cl<sub>2</sub>)

$\epsilon$  values of **1**, **2c** and **8–12** are referred from our previous reports<sup>1,2</sup>

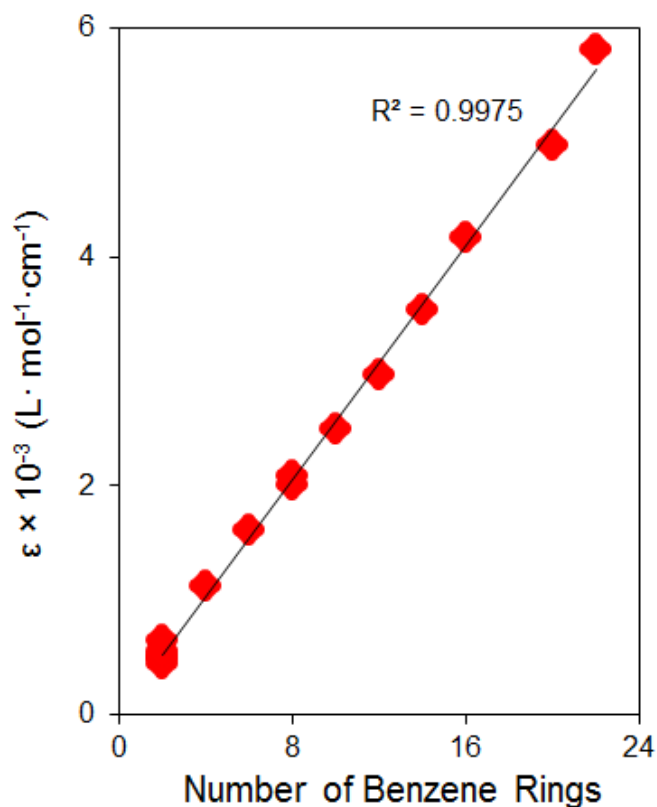

• Fluorescence emission spectra

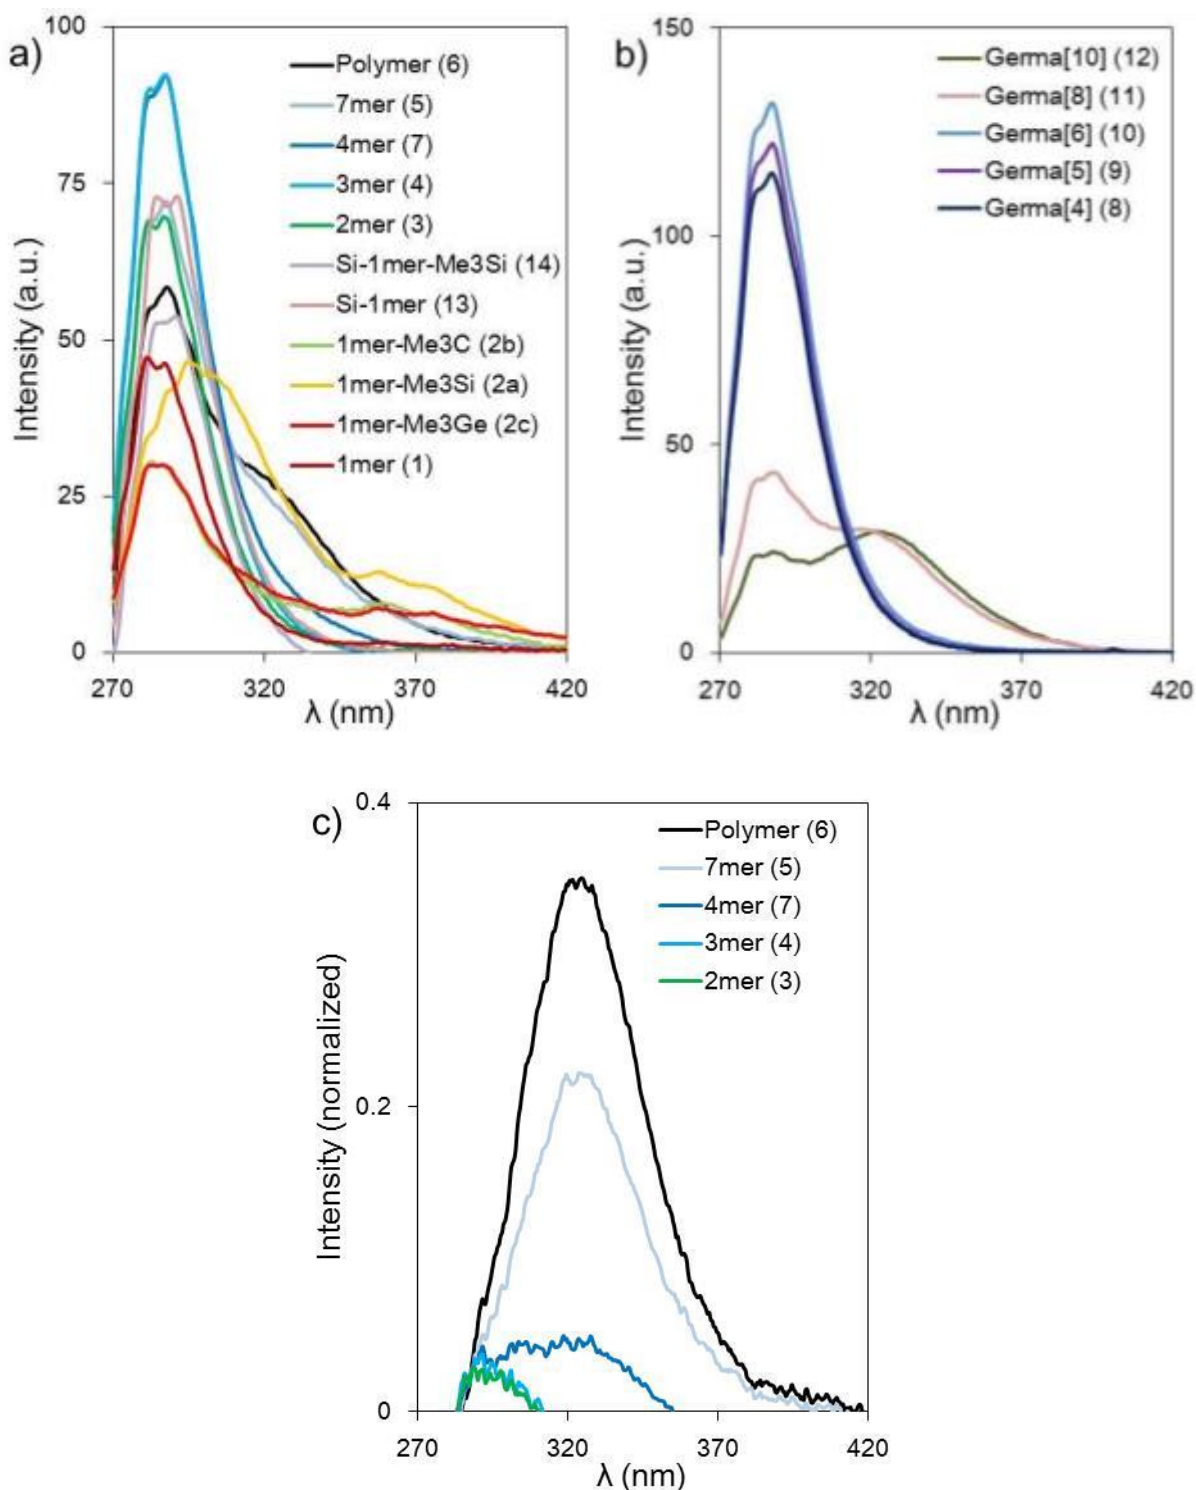

**Fig SI 3.** Fluorescence emission spectra [0.1 mM in  $\text{CH}_2\text{Cl}_2$ , a: polymers ( $\lambda_{\text{ex}} = 260$  nm), b: pericyclines ( $\lambda_{\text{ex}} = 260$  nm) referred from previous work for comparison,<sup>2</sup> c: normalized differential spectra of polymers ( $\lambda_{\text{ex}} = 260$  nm)]

• Phosphorescence emission spectra

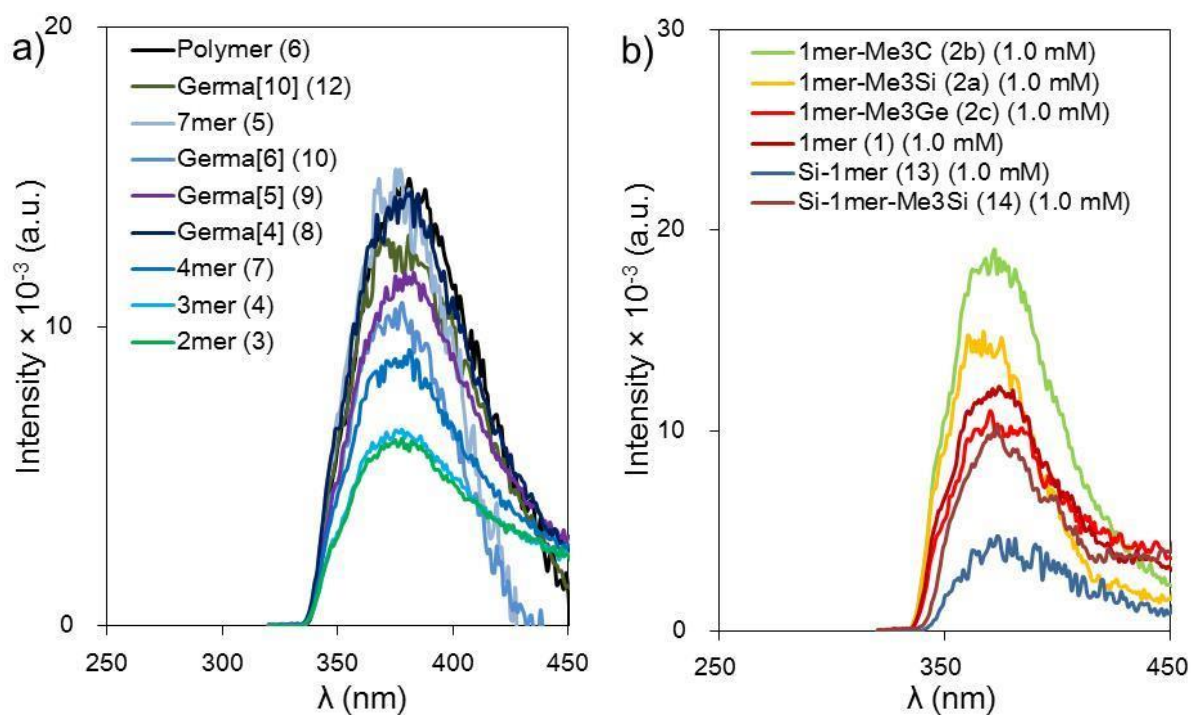

Fig SI 4. Phosphorescence emission spectra

(77K in 2-methyltetrahydrofuran,  $\lambda_{\text{ex}} = 260$  nm, background cut off; a: 0.1 mM, b) 1.0 mM)

**Table SI.** Phosphorescence maxima, intensity, and lifetime of compounds sorted by the number of phenyl rings<sup>a</sup>

| Compounds                                    | Number of Ph rings | Emission maxima (nm) | $T_P$ ( $\mu\text{s}$ ) |
|----------------------------------------------|--------------------|----------------------|-------------------------|
| 1mer <b>1</b> (1.0 mM)                       | 2                  | 380                  | 13.4                    |
| 1mer-GeMe <sub>3</sub> <b>2a</b> (1.0 mM)    | 2                  | 387                  | 14.5                    |
| 1mer- SiMe <sub>3</sub> <b>2b</b> (1.0 mM)   | 2                  | 375                  | 13.4                    |
| 1mer-CMe <sub>3</sub> <b>2c</b> (1.0 mM)     | 4                  | 381                  | 15.4                    |
| 2mer <b>3</b>                                | 4                  | 382                  | 14.7                    |
| 3mer <b>4</b>                                | 6                  | 386                  | 15.5                    |
| 4mer <b>5</b>                                | 8                  | 381                  | 15.5                    |
| Ge[4] <b>8</b>                               | 8                  | 382                  | 18.2                    |
| Ge[5] <b>9</b>                               | 10                 | 383                  | 14.0                    |
| Ge[6] <b>10</b>                              | 12                 | 389                  | 17.9                    |
| 7mer <b>5</b>                                | 14                 | 377                  | 15.3                    |
| Ge[8] <b>11</b>                              | 16                 | Insoluble            |                         |
| Ge[10] <b>12</b>                             | 20                 | 388                  | 14.7                    |
| Polymer <b>6</b>                             | ≈22                | 388                  | 18.2                    |
| Si-1mer <b>13</b> (1.0 mM)                   | 2                  | 390                  | 11.2                    |
| Si-1mer-SiMe <sub>3</sub> <b>14</b> (1.0 mM) | 2                  | 382                  | 13.4                    |

<sup>a</sup> Measured at 77 K as 0.1 mM solution of 2-methyltetrahydrofuran unless otherwise noted.



• Cyclic voltammetry (CV) and differential pulse voltammetry (DPV)

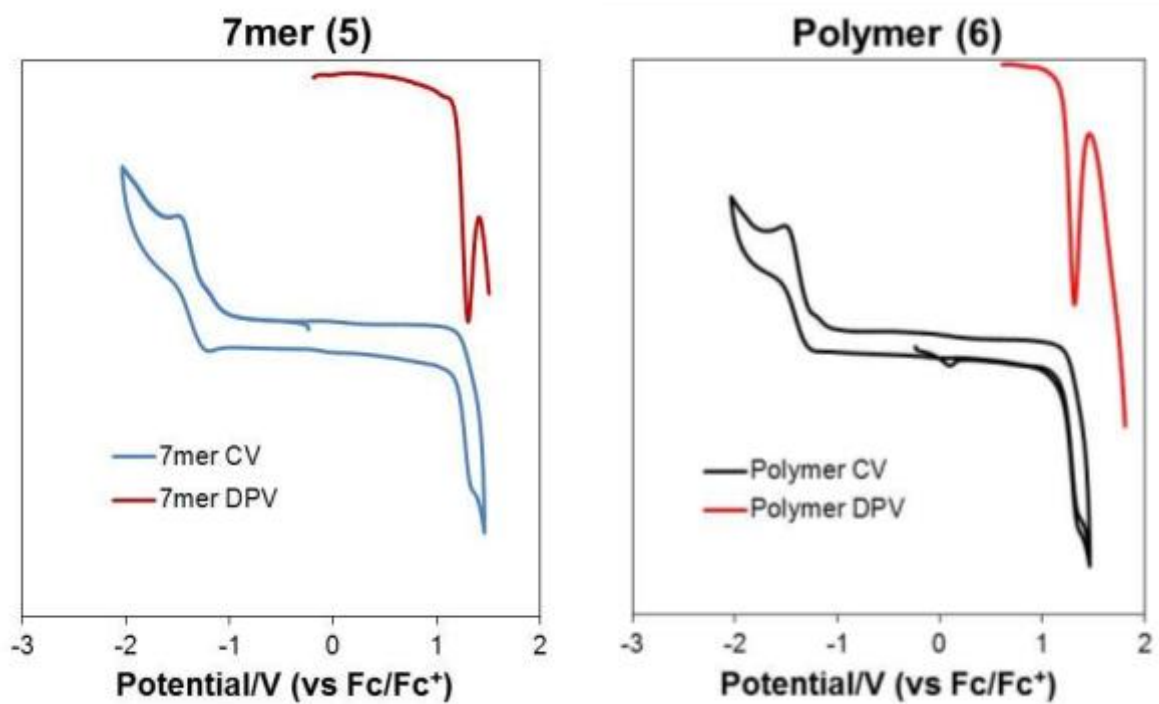

| Compounds   | Oxidation potential from DPV / V |
|-------------|----------------------------------|
| 7mer (5)    | 1.31                             |
| Polymer (6) | 1.31                             |

**Fig S5.** Cyclic and differential pulse voltammograms of germa[5], and [10]pericyclines (1.0 mM in 0.1 M *n*-Bu<sub>4</sub>NPF<sub>6</sub>/CH<sub>2</sub>Cl<sub>2</sub> solution; Scan rate = 0.1 V/s for **5**, 0.05 V/s for **6**)

# • GPC analysis results

¥Documents and Settings¥gameess¥My Documents¥システム3¥yamane.mdb 20141031-aza-konica-rep7times0005 Ph-polymer  
20141106 Thursday, Nov 6 2014

タイトル:

## <表題部>

|         |                                     |          |                       |
|---------|-------------------------------------|----------|-----------------------|
| サンプル名   | : Ph-polymer 20141106               | 測定日時     | : 2014/11/06 10:50:04 |
| ファイル名   | : yamane.mdb                        | 計算日時     | : 2014/11/06 11:44:11 |
| 保存ファイル名 | : 20141031-aza-konica-rep7times0005 | サンプル番号   | : 5                   |
| マウント名   | : 20141031-aza-konica-rep7times0005 | ジョブ番号    | :                     |
| 収集属性    | : 従属                                | 収集時間 [分] | : 0.00 - 35.00        |
| 計算Ch    | : Ch 1                              | 計算方法     | : 分子量計算               |

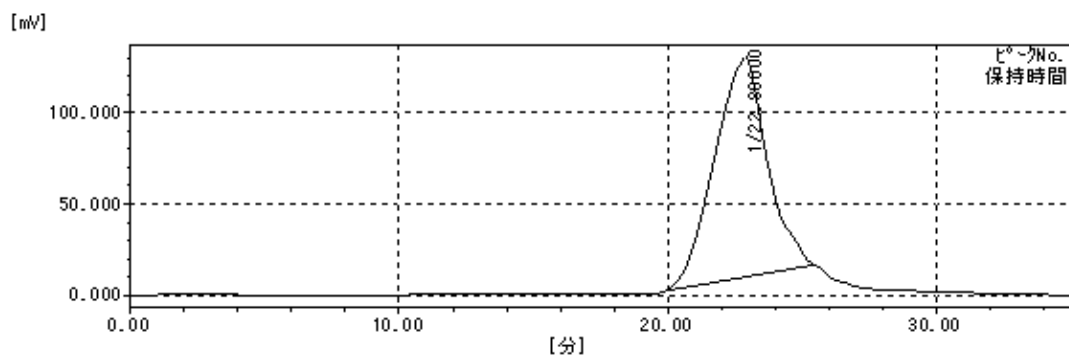

## <Ch1 分子量計算結果>

ピーク 1 のピーク

|           | [分]   | [mV]        | [MOL]  |          |         |
|-----------|-------|-------------|--------|----------|---------|
| ピークセント    | 19.92 | 2.450       | 12,108 | Mn       | : 2,778 |
| ピークオフ     | 22.88 | 130.578     | 2,905  | Mw       | : 3,420 |
| ピークエンド    | 25.47 | 16.738      | 607    | Mz       | : 4,110 |
|           |       |             |        | Mz +1    | : 4,839 |
|           |       |             |        | Mv       | : 3,420 |
| 面積 [mV・秒] |       | 16,353.827  |        | Mp       | : 2,961 |
| 面積比 [%]   |       | 100.000     |        | Mz/Mw    | : 1.202 |
| 高さ [mV]   |       | 120.502     |        | Mw/Mn    | : 1.231 |
| [η]       |       | 3,420.14904 |        | Mz +1/Mw | : 1.415 |

## <Ch1 分子量計算結果>

全体

|           | [分]   | [mV]        | [MOL]  |          |         |
|-----------|-------|-------------|--------|----------|---------|
| ピークセント    | 19.92 | 2.450       | 12,108 | Mn       | : 2,778 |
| ピークオフ     | 22.88 | 130.578     | 2,905  | Mw       | : 3,420 |
| ピークエンド    | 25.47 | 16.738      | 607    | Mz       | : 4,110 |
|           |       |             |        | Mz +1    | : 4,839 |
|           |       |             |        | Mv       | : 3,420 |
| 面積 [mV・秒] |       | 16,353.827  |        | Mp       | : 2,961 |
| 面積比 [%]   |       | 100.000     |        | Mz/Mw    | : 1.202 |
| 高さ [mV]   |       | 120.502     |        | Mw/Mn    | : 1.231 |
| [η]       |       | 3,420.14904 |        | Mz +1/Mw | : 1.415 |

• **HOMO/LUMO orbitals and energy levels estimated by DFT calculation (Table SI 2)**

[Gaussian 09, DFT- B3LYP6-31G(d,p); Calculations of **8** and **10** are based on obtained cif file conformation.

The results of germa[5]pericyclyne **9** is referred from our reported data for comparison.<sup>2</sup> Compound **15** was calculated as a model compound]

|               | 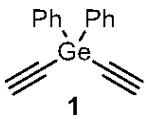<br><b>1</b> | <br><b>2c</b> | <br><b>4</b> | <br><b>15</b> |
|---------------|-----------------------------------------------------------------------------------------------|------------------------------------------------------------------------------------------------|-------------------------------------------------------------------------------------------------|--------------------------------------------------------------------------------------------------|
| <b>LUMO+1</b> |              |              |              |               |
|               | -0.439 eV                                                                                     | -0.334 eV                                                                                      | -0.561 eV                                                                                       | -0.441 eV                                                                                        |
| <b>LUMO</b>   |             |             |             |              |
|               | -0.543 eV                                                                                     | -0.401 eV                                                                                      | -0.644 eV                                                                                       | -0.542 eV                                                                                        |
| <b>HOMO</b>   |            |            |            |             |
|               | -6.74 eV                                                                                      | -6.56 eV                                                                                       | -6.68 eV                                                                                        | -6.65 eV                                                                                         |

|               |                                                                                                                                 |                                                                                                                                   |                                                                                                                                   |                                                                                                                                   |
|---------------|---------------------------------------------------------------------------------------------------------------------------------|-----------------------------------------------------------------------------------------------------------------------------------|-----------------------------------------------------------------------------------------------------------------------------------|-----------------------------------------------------------------------------------------------------------------------------------|
|               | 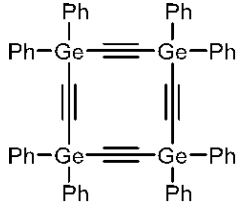 <p style="text-align: right;">8</p>           |  <p style="text-align: right;">9<br/>(ref 2)</p> |  <p style="text-align: right;">10</p>          |  <p style="text-align: right;">13</p>          |
| <b>LUMO+1</b> |  <p style="text-align: center;">-0.525 eV</p>  |  <p style="text-align: center;">-0.485 eV</p>    |  <p style="text-align: center;">-0.446 eV</p>  |  <p style="text-align: center;">-0.442 eV</p>  |
| <b>LUMO</b>   |  <p style="text-align: center;">-0.801 eV</p> |  <p style="text-align: center;">-0.559 eV</p>   |  <p style="text-align: center;">-0.492 eV</p> |  <p style="text-align: center;">-0.696 eV</p> |
| <b>HOMO</b>   |  <p style="text-align: center;">-6.55 eV</p> |  <p style="text-align: center;">-6.48 eV</p>   |  <p style="text-align: center;">-6.45 eV</p> |  <p style="text-align: center;">-6.61 eV</p> |

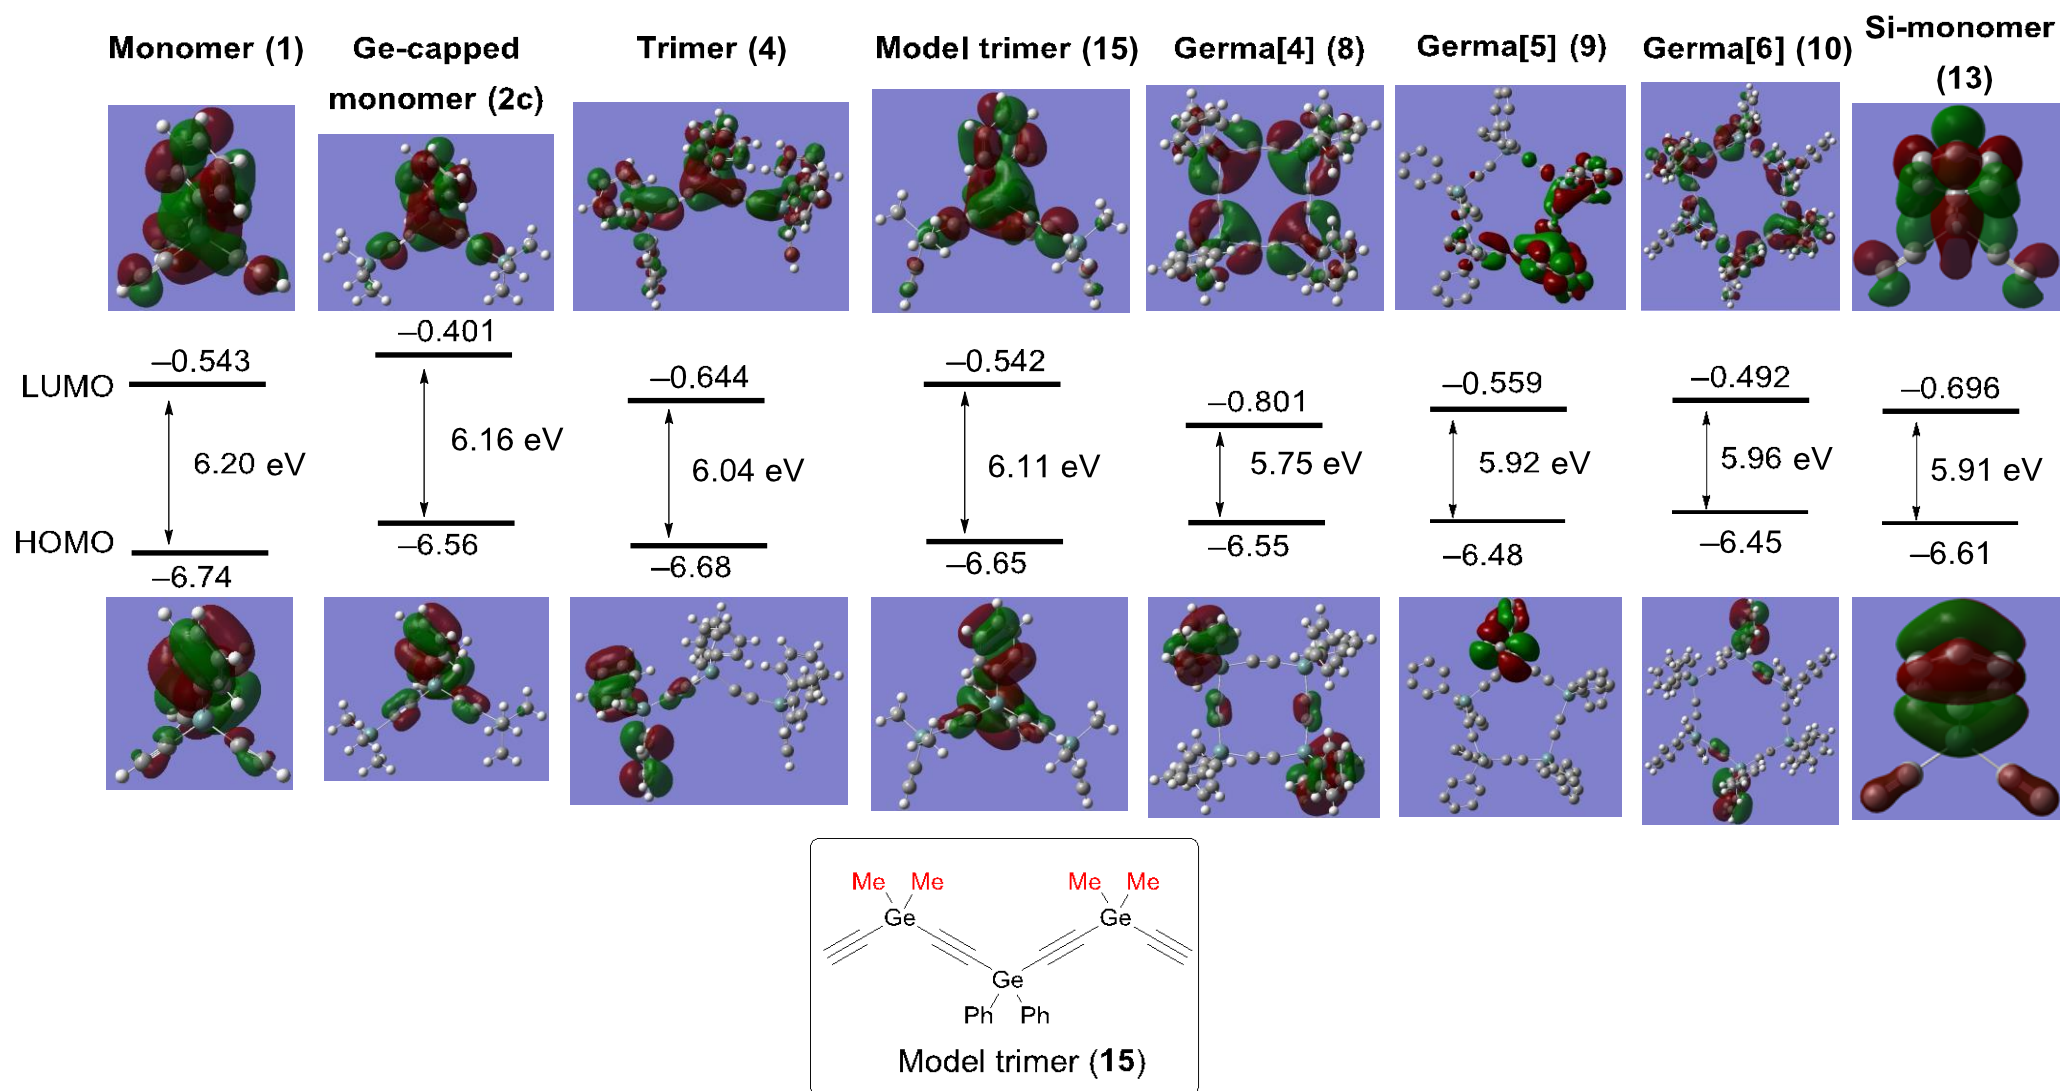

Fig SI 5. HOMO-LUMO orbitals and levels of acyclic/cyclic germylene-ethynylene materials

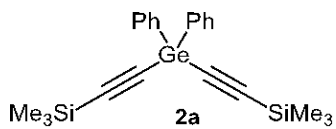

Z:\NMR-data\Ph-TMSgermane\tn\_02\_152 redata\_Proton-1-1.jdf

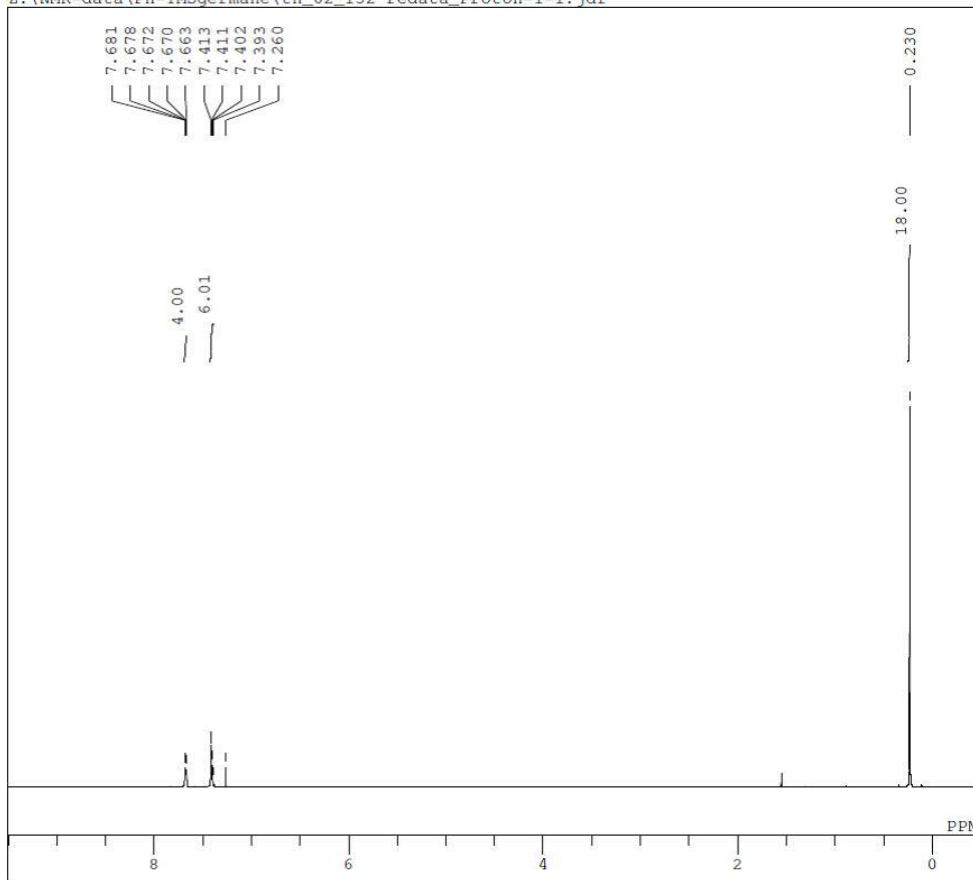

```

DFILE  tn_02_152 redata_Proton-1-1.jdf
COMNT  single_pulse
DATIM  2014-11-12 14:12:03
OBNUC  1H
EXMOD  proton.jxp
OBFREQ 500.16 MHz
OBSET  2.41 KHz
OBFIN  6.01 Hz
POINT  16384
FREQU  9384.38 Hz
SCANS  8
ACQTM  1.7459 sec
PD      5.0000 sec
PW1     6.22 usec
IRNUC  1H
CTEMP  16.7 c
SLVNT  CDCL3
EXREF  7.26 ppm
BF      0.10 Hz
RGAIN  40
  
```

Z:\NMR-data\Ph-TMSgermane\tn\_02\_152 redata\_Carbon-1-1.jdf

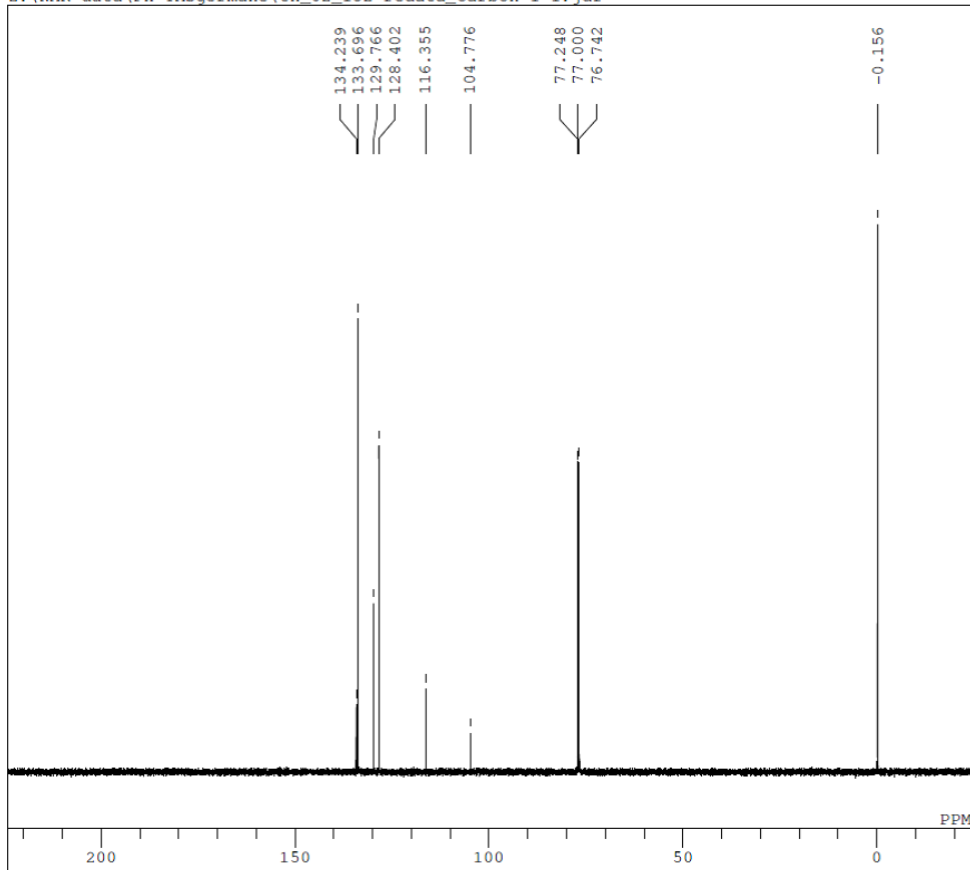

```

DFILE  tn_02_152 redata_Carbon-1-1.jdf
COMNT  single_pulse decoupled gated NOE
DATIM  2014-11-12 13:34:23
OBNUC  13C
EXMOD  carbon.jxp
OBFREQ 125.77 MHz
OBSET  7.87 KHz
OBFIN  4.21 Hz
POINT  32767
FREQU  39308.18 Hz
SCANS  545
ACQTM  0.8336 sec
PD      2.0000 sec
PW1     3.12 usec
IRNUC  1H
CTEMP  16.5 c
SLVNT  CDCL3
EXREF  77.00 ppm
BF      0.10 Hz
RGAIN  60
  
```

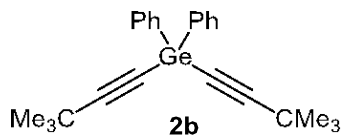

Z:\NMR-data\Ph-tBu-protectedgermane\tn\_02\_153 reredata\_Proton-1-1.als

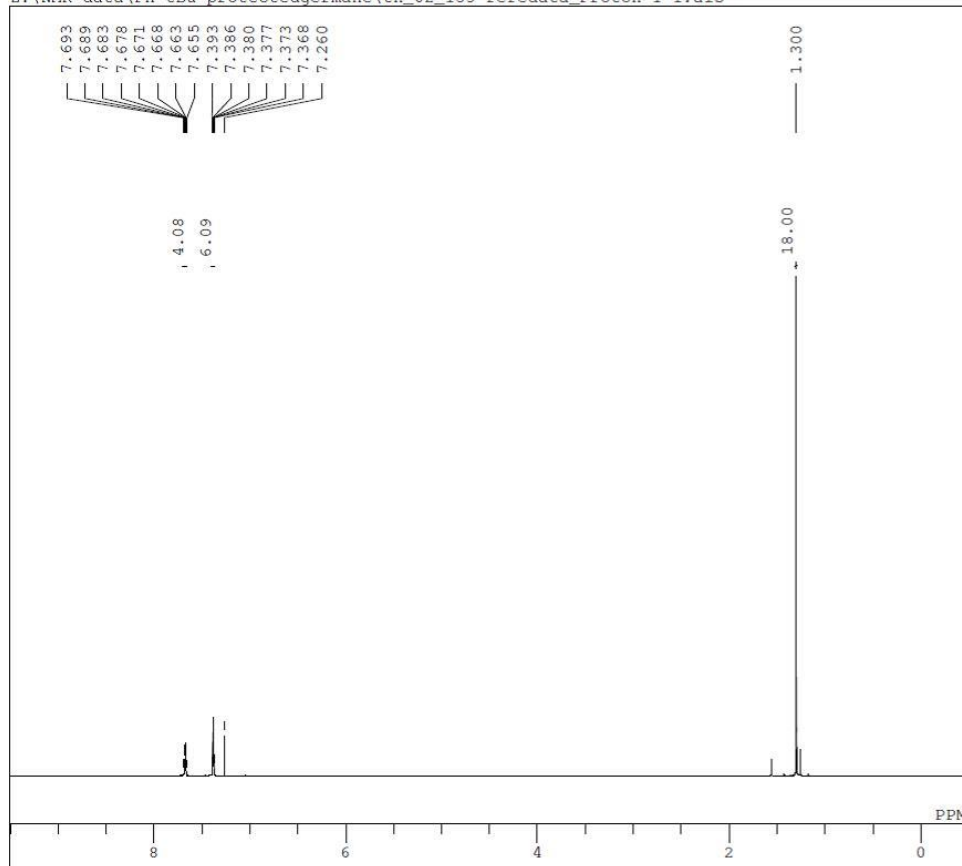

```

DFILE tn_02_153 reredata_Proton-1-1.als
COMNT single_pulse
DATIM 2014-11-17 20:14:25
OBNUC 1H
EXMOD proton.jxp
OBFRQ 500.16 MHz
OBSET 2.41 KHz
OBFIN 6.01 Hz
POINT 13107
FREQU 7507.51 Hz
SCANS 8
ACQTM 1.7459 sec
PD 5.0000 sec
PW1 6.22 usec
IRNUC 1H
CTEMP 14.8 c
SLVNT CDCL3
EXREF 7.26 ppm
BF 0.10 Hz
RGAIN 44
  
```

Z:\NMR-data\Ph-tBu-protectedgermane\tn\_02\_153 redata\_Carbon-1-1.jdf

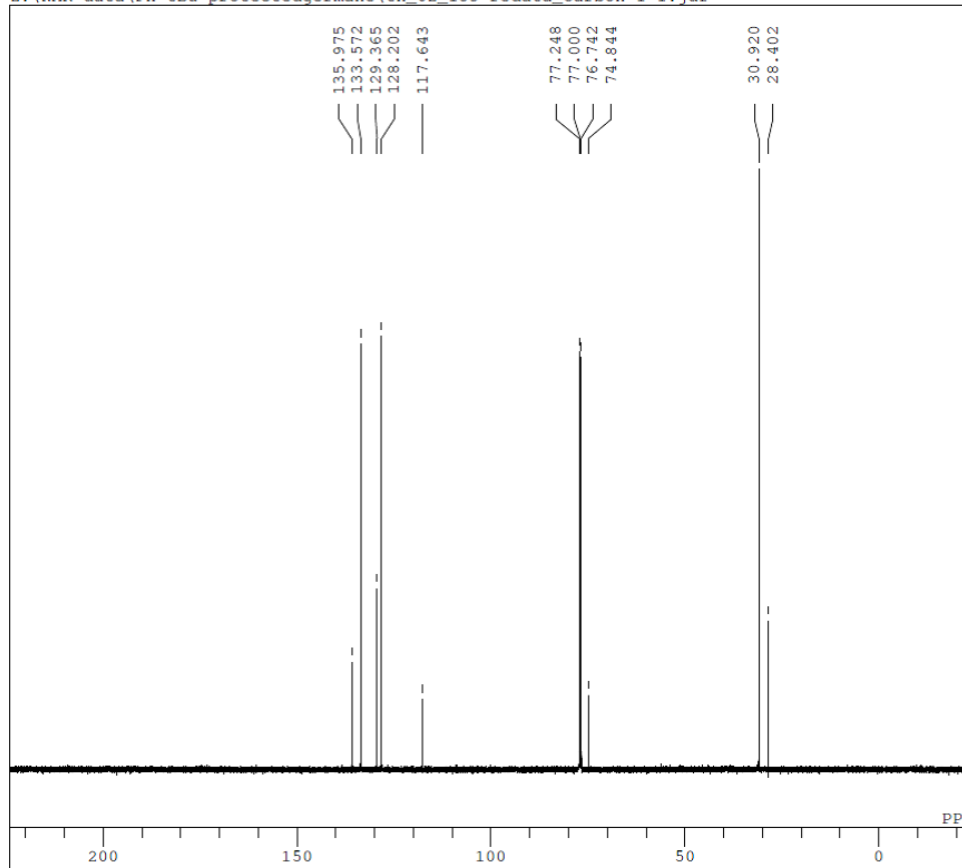

```

DFILE tn_02_153 redata_Carbon-1-1.jdf
COMNT single pulse decoupled gated NOE
DATIM 2014-11-14 17:58:09
OBNUC 13C
EXMOD carbon.jxp
OBFRQ 125.77 MHz
OBSET 7.87 KHz
OBFIN 4.21 Hz
POINT 32767
FREQU 39308.18 Hz
SCANS 1024
ACQTM 0.8336 sec
PD 2.0000 sec
PW1 3.12 usec
IRNUC 1H
CTEMP 18.2 c
SLVNT CDCL3
EXREF 77.00 ppm
BF 0.10 Hz
RGAIN 60
  
```

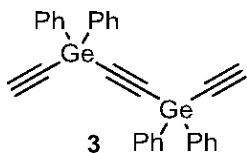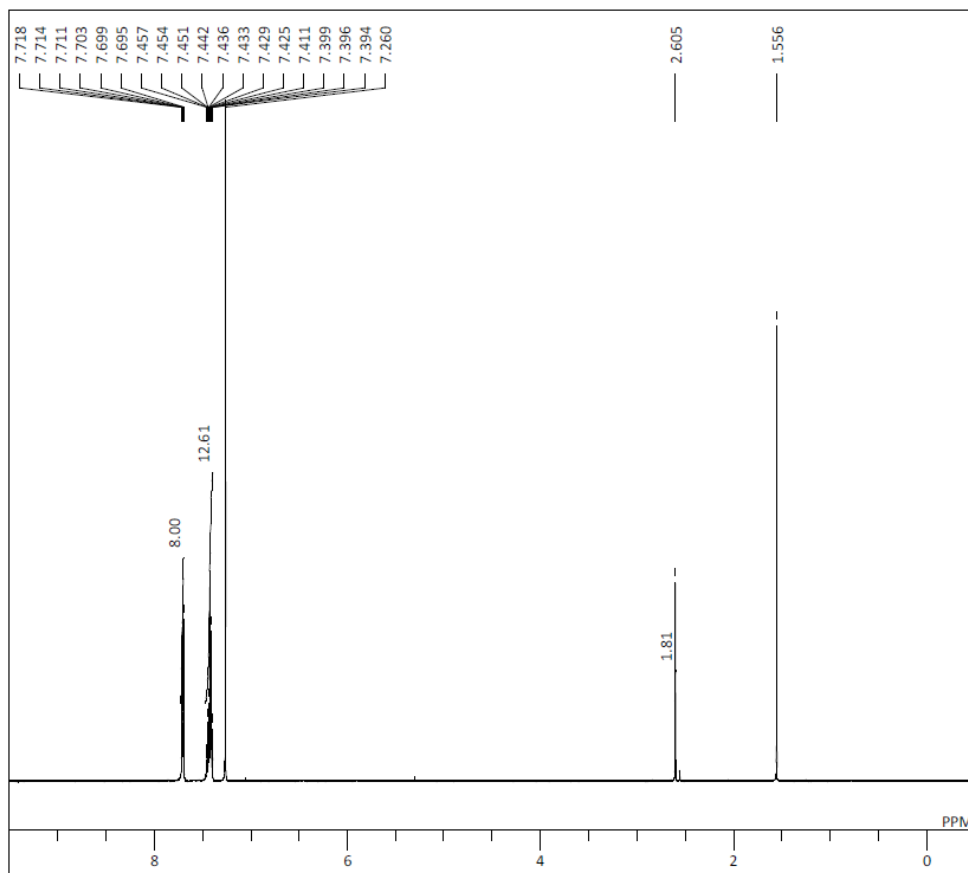

DFILE Ph-Ge Dimer data\_Proton-1-1.als  
 COMNT single\_pulse  
 DATIM 2014-12-17 21:14:38  
 OBNUC 1H  
 EXMOD proton.jxp  
 OBFREQ 500.16 MHz  
 OBSET 2.41 KHz  
 OBFIN 6.01 Hz  
 POINT 13107  
 FREQU 7507.51 Hz  
 SCANS 8  
 ACQTM 1.7459 sec  
 PD 5.0000 sec  
 PW1 6.22 usec  
 IRNUC 1H  
 CTEMP 15.3 c  
 SLVNT CDCL3  
 EXREF 7.26 ppm  
 BF 0.10 Hz  
 RGAIN 48

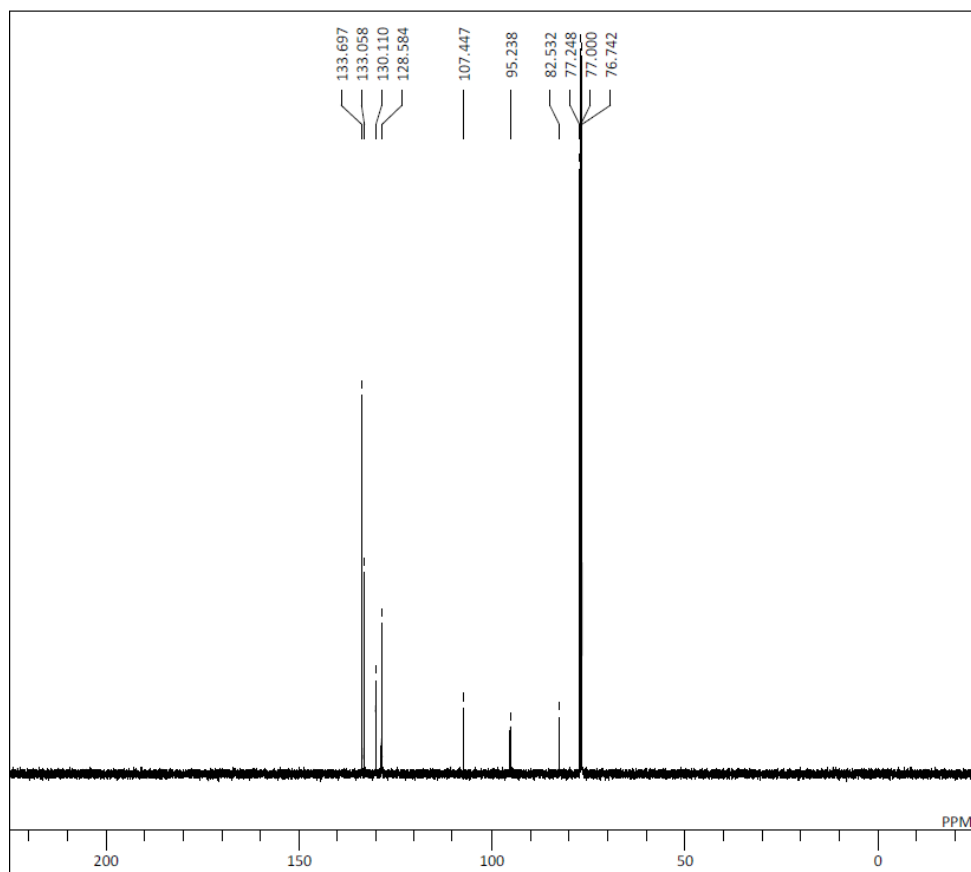

DFILE Dimer3\_Carbon-1-1.als  
 COMNT single pulse decoupled gated NOE  
 DATIM 2015-03-18 15:46:30  
 OBNUC 13C  
 EXMOD carbon.jxp  
 OBFREQ 125.77 MHz  
 OBSET 7.87 KHz  
 OBFIN 4.21 Hz  
 POINT 26214  
 FREQU 31446.54 Hz  
 SCANS 1024  
 ACQTM 0.8336 sec  
 PD 2.0000 sec  
 PW1 3.12 usec  
 IRNUC 1H  
 CTEMP 16.2 c  
 SLVNT CDCL3  
 EXREF 77.00 ppm  
 BF 0.10 Hz  
 RGAIN 50



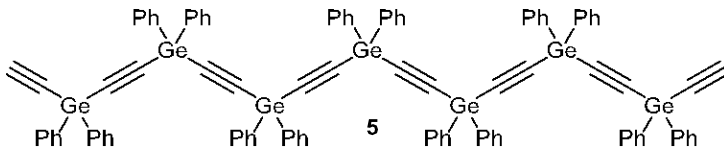

Z:\NMR-data\Ph-7Ge\tn\_02\_123 cc2recycle2\_Proton-2-1.als

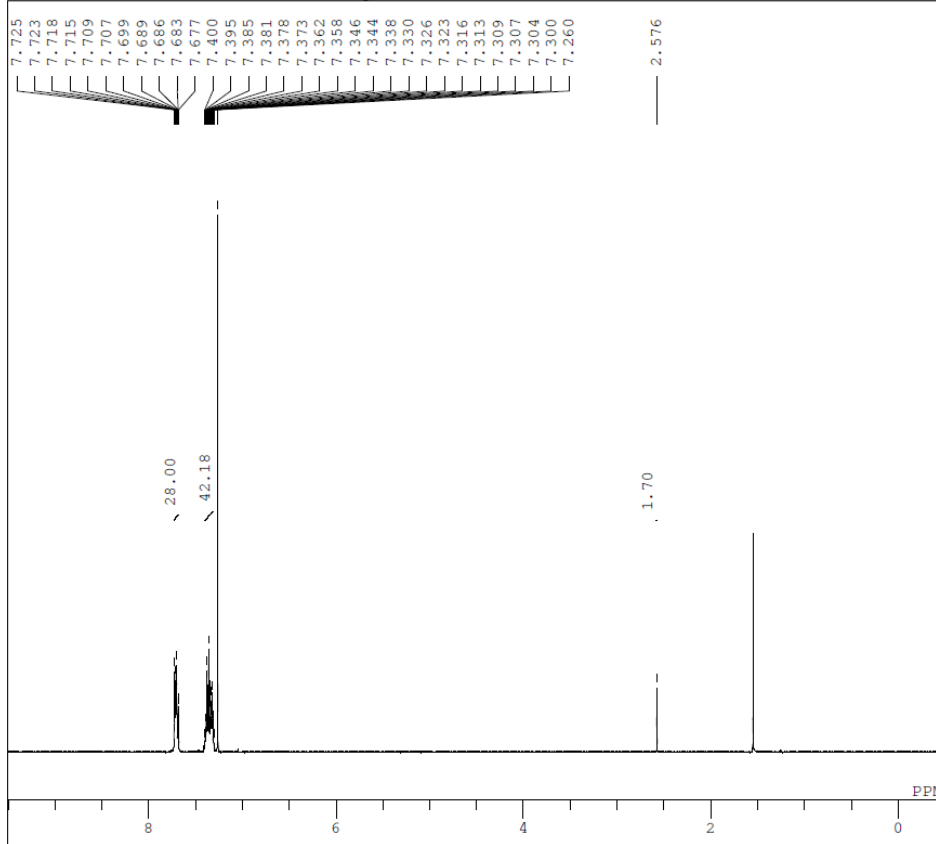

```

DFILE tn_02_123 cc2recycle2_Proton-2-1.als
COMNT single_pulse
DATIM 2014-10-27 19:51:40
OBNUC 1H
EXMOD proton.jxp
OBFREQ 500.16 MHz
OBSET 2.41 KHz
OBFIN 6.01 Hz
POINT 13107
FREQU 7507.51 Hz
SCANS 8
ACQTM 1.7459 sec
PD 5.0000 sec
PW1 6.22 usec
IRNUC 1H
CTEMP 16.7 c
SLVNT CDCL3
EXREF 7.26 ppm
BF 0.10 Hz
RGAIN 50
  
```

Z:\NMR-data\Ph-7Ge\Ph-Ge7mer data\_Carbon-1-1.als

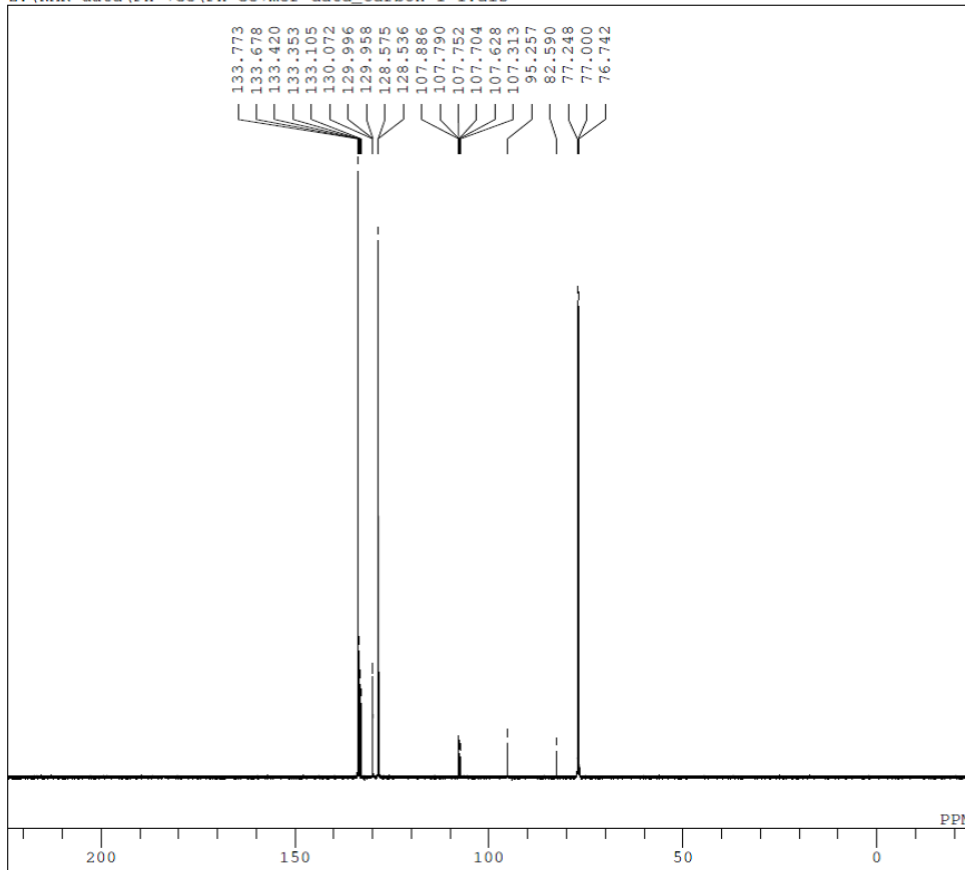

```

DFILE Ph-Ge7mer data_Carbon-1-1.als
COMNT single_pulse decoupled gated NOE
DATIM 2014-10-30 02:16:02
OBNUC 13C
EXMOD carbon.jxp
OBFREQ 125.77 MHz
OBSET 7.87 KHz
OBFIN 4.21 Hz
POINT 26214
FREQU 31446.54 Hz
SCANS 4000
ACQTM 0.8336 sec
PD 2.0000 sec
PW1 3.12 usec
IRNUC 1H
CTEMP 16.0 c
SLVNT CDCL3
EXREF 77.00 ppm
BF 0.10 Hz
RGAIN 60
  
```

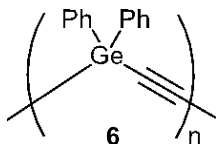

Z:\NMR-data\Ph-Polymer\Ex.146 cc4\tn\_02\_146 cc4polymer2\_Proton-1-1 (2).als

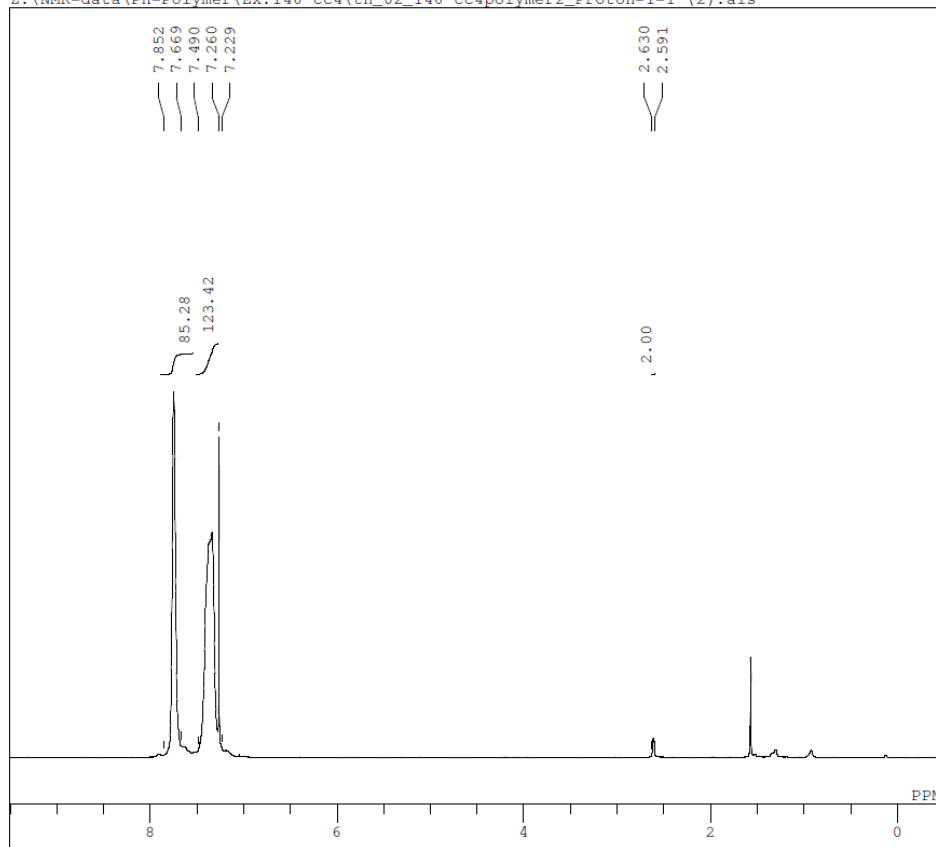

```

DFILE   tn_02_146 cc4polymer2_Proton-1-1 (2).
COMNT   single_pulse
DATIM   2014-10-14 00:25:02
OBNUC   1H
EXMOD   proton.jpg
OBFRQ   500.16 MHz
OBSET   2.41 KHz
OBFIN   6.01 Hz
POINT   13107
FREQU   7507.51 Hz
SCANS   8
ACQTM   1.7459 sec
PD      5.0000 sec
PW1     6.22 usec
IRNUC   1H
CTEMP   18.3 c
SLVNT   CDCL3
EXREF   7.26 ppm
BF      0.10 Hz
RGAIN   30
  
```

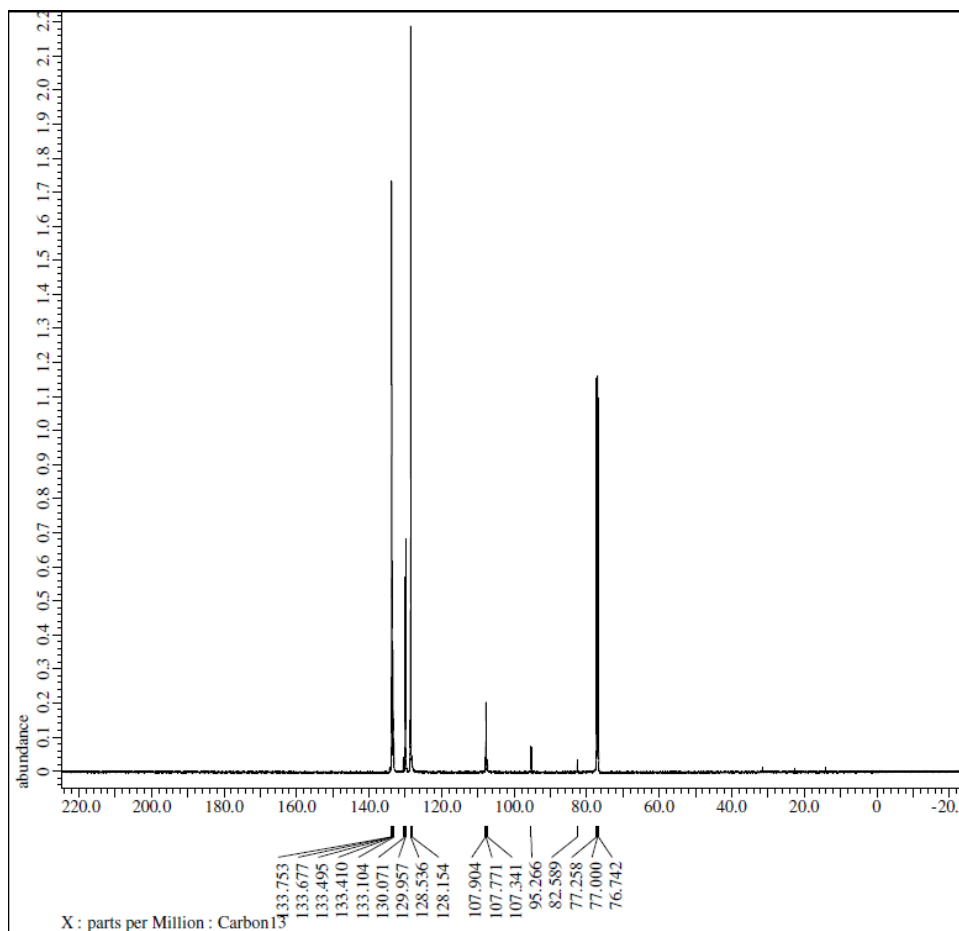

```

Filename = tn_02_146 cc4polymer2_Ca
Author   = delta
Experiment = carbon.jpg
Sample Id = tn_02_146 cc4polymer2
Solvent   = CHLOROFORM-D
Creation_Time = 14-OCT-2014 00:26:27
Revision_Time = 4-FEB-2015 17:59:31
Current_Time = 4-FEB-2015 18:03:54

Comment = single pulse decoupled g
Data_Format = 1D COMPLEX
Dim_Size = 26214
Dim_Title = Carbon13
Dim_Units = [ppm]
Dimensions = x
Site = JNM-EX500
Spectrometer = DELTA2_NMR

Field_Strength = 11.7473579 [T] (500[MHz])
X_Acq_Duration = 0.83361792 [s]
X_Domain = 13C
X_Freq = 125.76529768 [MHz]
X_Offset = 100 [ppm]
X_Points = 32768
X_Prescans = 4
X_Resolution = 1.19959034 [Hz]
X_Sweep = 39.3081761 [kHz]
X_Sweep_Clipped = 31.44654088 [kHz]
Irr_Domain = Proton
Irr_Freq = 500.15991521 [MHz]
Irr_Offset = 5.0 [ppm]
Clipped = FALSE
Scans = 4000
Total_Scans = 4000

Relaxation_Delay = 2 [s]
Recvr_Gain = 60
Temp_Get = 18.4 [dc]
X_90_Width = 8.36 [us]
X_Acq_Time = 0.83361792 [s]
X_Angle = 30 [deg]
X_Atn = 3 [db]
X_Pulse = 3.12 [us]
Irr_Atn_Dec = 21.37 [db]
Irr_Atn_Noise = 21.37 [db]
Irr_Noise = WALTZ
Irr_Fwidth = 92 [us]
Decoupling = TRUE
Initial_Wait = 1 [s]
Noe = TRUE
Noe_Time = 2 [s]
Repetition_Time = 2.83361792 [s]
  
```

## •References

- 1) H. Tanimoto, T. Nagao, Y. Nishiyama, T. Morimoto, F. Iseda, Y. Nagato, T. Suzuka, K. Tsutsumi and K. Kakiuchi, *Dalton Trans.* 2014, **43**, 8338–8343.
- 2) H. Tanimoto, T. Nagao, T. Fujiwara, Y. Nishiyama, T. Morimoto, T. Suzuka, K. Tsutsumi and K. Kakiuchi, *Dalton Trans.* 2015, **44**, 11811–11818
